# Supplementary material
Source: publisher site journal article supplement (https://www.dovepress.com/get_supplementary_file.php?f=508698.docx)
Supplement: Supplementary file 1 [file get_supplementary_file.php]

**Appendix 1**

Total RNA was isolated with RNAiso Plus (TAKARA), following the manufacturer's instructions. Reverse transcription was performed using PrimeScript™ RT reagent Kit (TAKARA). Real-time PCR was performed using HieffTM qPCR SYBR Green Master Mix (YEASEN) on an ABI ViiA7 system (Applied Biosystems). The analysis was performed under following conditions: 5 min at 95 °C, followed by 40 cycles of 10 s at 95 °C, and a final extension of 30 s at 60 °C.

The following primers were used for the PCR:

FAM134B forward primer: TTAAGCCTTGGTTTGCCCAC;

FAM134B reverse primer: GCGTCTCTTTGCTTGGTCTG;

β-Actin forward primer: CATGTACGTTGCTATCCAGGC;

β-Actin reverse primer: CTCCTTAATGTCACGCACGAT.

**Appendix 2**

Statistical analyses were performed using SPSS version 18.0 and R version 4.4.1 (R Core Team, 2024, https://www.R-project.org/). Demographic data, clinical features, and plasma FAM134B mRNA levels were compared using Student’s t-test or the Mann–Whitney U test for continuous and categorical data, respectively. Pearson’s correlation analysis was performed to evaluate the relevance of plasma FAM134B mRNA levels to the TCSS score and the different indices of NCT, and one-way ANOVA was applied for measuring the differences of TCSS score across plasma FAM134B mRNA levels.

The association between plasma FAM134B mRNA levels and DPN risk was assessed using logistic regression models. Plasma FAM134B mRNA levels were considered as continuous and categorical variables, divided into quartiles, with the lowest quartile (F1, <1.507) serving as the reference group. The analysis was performed across three models with stepwise adjustments for potential confounders. Model 1 was unadjusted, providing the crude association between FAM134B mRNA levels and DPN. Model 2 adjusted for age, sex, and BMI, alongside the variables in Model 1. Model 3 further adjusted for smoking status, diabetes duration, presence of chronic complications, and HbA1c levels, building upon Model 2. Trend tests were applied to assess the dose-response correlation across the quartiles, with *p*-values calculated to assess the statistical significance of these trends.

Subgroup analyses were also performed to investigate potential effect modifications by various demographic and clinical factors, including sex, BMI, age, smoking status, presence of complications, diabetes duration, and HbA1c levels. Interaction terms were incorporated into the models to calculate multiplicative interaction effects, and *p*-values for interactions were obtained to determine their significance. A restricted cubic spline (RCS) plot was used to explore the non-linear relationship between plasma FAM134B mRNA levels and the odds of developing DPN. The analysis was performed both unadjusted and adjusted for potential confounders identified in the multivariate models. The statistical significance of the overall association and the non-linear components was evaluated, with *p*-values calculated for both.

A two-piecewise linear regression model was employed to investigate the relationship between plasma FAM134B mRNA levels and DPN risk. The analysis was performed separately for FAM134B mRNA levels both below and above the identified inflection point. Odds rations (ORs) and confidence interval (CI) were calculated for both unadjusted and adjusted potential confounders. The statistical significance of the model fit was assessed using a log-likelihood ratio test.

To assess the diagnostic performance of FAM134B mRNA levels in predicting DPN, receiver operating characteristic (ROC) curves were drawn, with calculating the area under the curve (AUC). The baseline model was compared with a model incorporating FAM134B mRNA to assess the improvement in discrimination. Feature importance was analyzed using the Boruta algorithm, which identifies and ranks the contributions of FAM134B mRNA alongside other clinical variables. Decision curve analysis (DCA) was performed to quantify the clinical utility and net benefit of adding FAM134B mRNA to the model across various threshold probabilities. Calibration plots were generated to compare the predicted and observed risks of DPN by assessing the calibration performance of the models. Additionally, model performance was evaluated using reclassification metrics, including integrated discrimination improvement (IDI) and net reclassification improvement (NRI), along with the C-index, to determine the added value of FAM134B mRNA to the existing model.
